# Supplementary material for: Synoptic-intraseasonal variability control on high chlorophyll-a events in the Puyuhuapi Fjord, Chilean Patagonia
Source: Copernicus journal article supplement (doi:10.5194/egusphere-2023-2272), 2023-10-12
Supplement: Supplementary file 1 [file egusphere-2023-2272-supplement.pdf]

# Synoptic-intraseasonal variability control on high chlorophyll-a events in the Puyuhuapi Fjord, Chilean Patagonia.

Reynier Bada-Diaz<sup>1,2,3</sup>, Martin Jacques-Coper<sup>2,3,5</sup>, Laura Farías<sup>1,3,6</sup>, Diego Narváez<sup>1,5</sup>, Italo Masotti<sup>3,4</sup>

<sup>1</sup>Departamento de Oceanografía, Universidad de Concepción, Concepción, CP 4030000, Chile

<sup>2</sup>Departamento de Geofísica, Universidad de Concepción, Concepción, CP 4030000, Chile

<sup>3</sup>Centro de Ciencia del Clima y la Resiliencia (CR)2, Universidad de Concepción, Concepción, CP 4030000, Chile

<sup>4</sup>Facultad de Ciencias del Mar y de Recursos Naturales, Universidad de Valparaíso, Valparaíso, CP 2362807, Chile

<sup>5</sup>Centro de Investigación Oceanográfica COPAS COASTAL, Universidad de Concepción, Concepción, CP 4030000, Chile

<sup>6</sup>Instituto Milenio en Socio-Ecología Costera, SECOS, Universidad de Concepción, Concepción, CP 4030000, Chile

*Correspondence to:* Reynier Bada-Diaz (rbada@udec.cl)

Supplementary material.

Table S1. Correlation coefficients for sea level pressure (SLP), surface temperature (TS), salinity (S) and chlorophyll-a (chl-a) variables, corresponding to summer 2016 (DJF). SLP data taken from the ERA5 Reanalysis, and the other variables correspond to data from the buoy located in the Puyuhuapi fjord (PF).

|              |            |              |             |
|--------------|------------|--------------|-------------|
|              | <b>slp</b> |              |             |
| <b>chl-a</b> | -0,2375    | <b>chl-a</b> |             |
| <b>temp</b>  | 0,2614     | -0,4693      | <b>temp</b> |
| <b>sal</b>   | 0,1159     | 0,0589       | -0,211      |

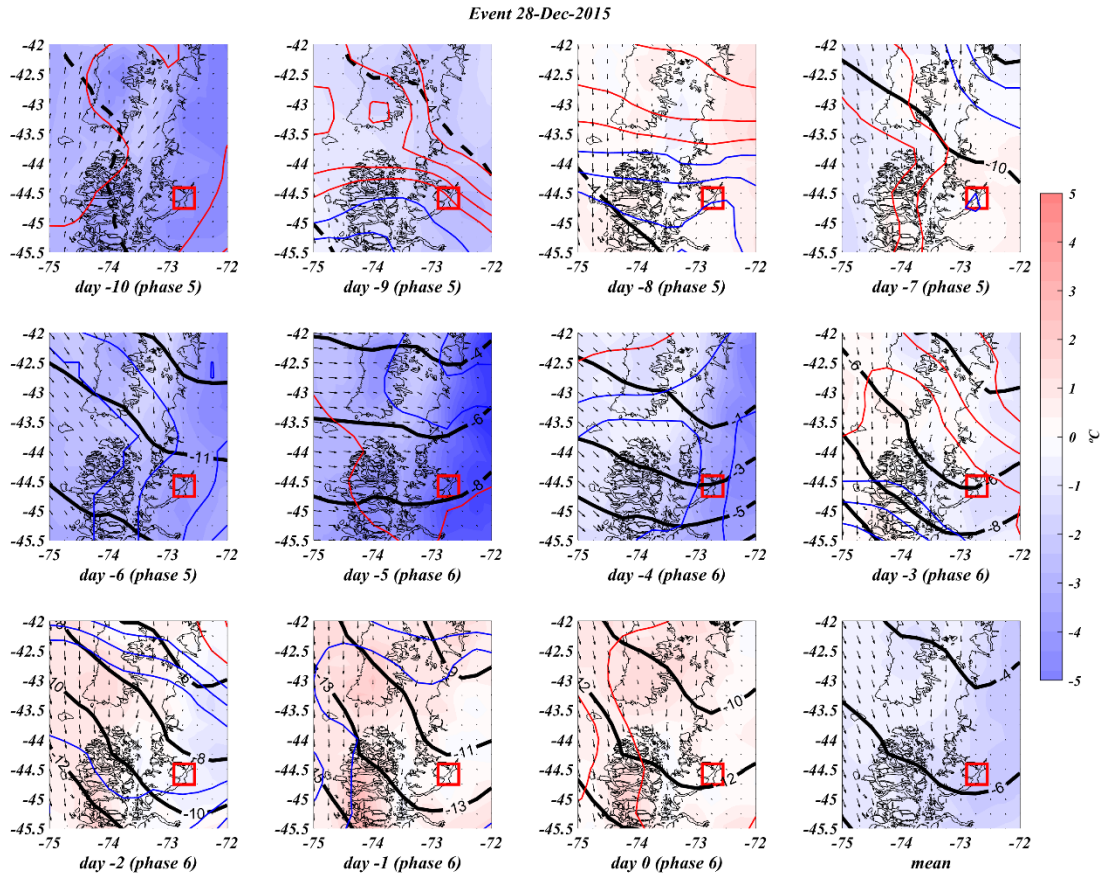

Figure S1. Sequence of daily composites of intraseasonal anomalies, starting 10 days before the occurrence of the extreme event of high chl-a on 28-Dec-2015. Each panel corresponds to one day and the last panel corresponds to the average of the 10-day composites of anomalies. Colors indicate t2m, blacks contours indicate SLP every 1 hPa (continuous contours: negative anomaly, dashed contours: positive anomaly), color contours indicate incoming solar radiation every 20 W/m2 (red: positive anomaly, blue: negative anomaly) and vectors indicate wind speed. Source: ERA5 reanalysis.

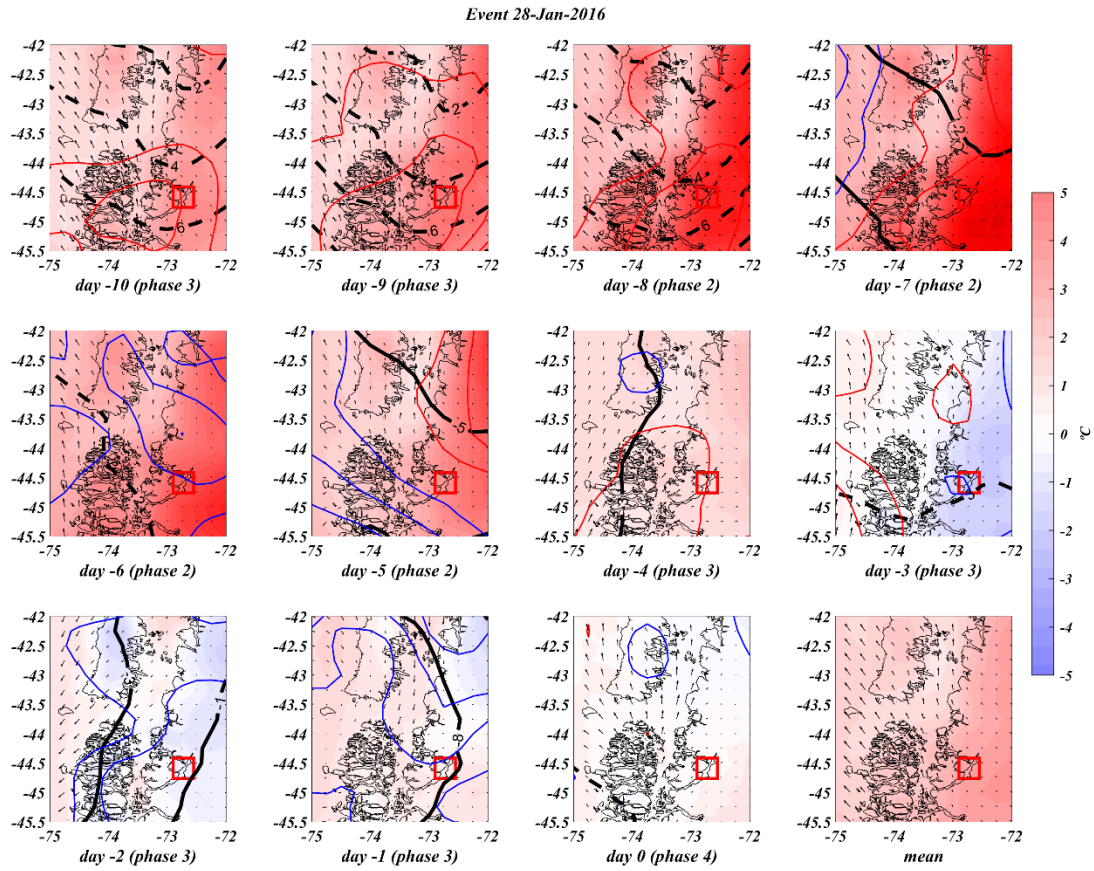

Figure S2. As Figure S1, but for the extreme event of high chl-a on 28-Jan-2016

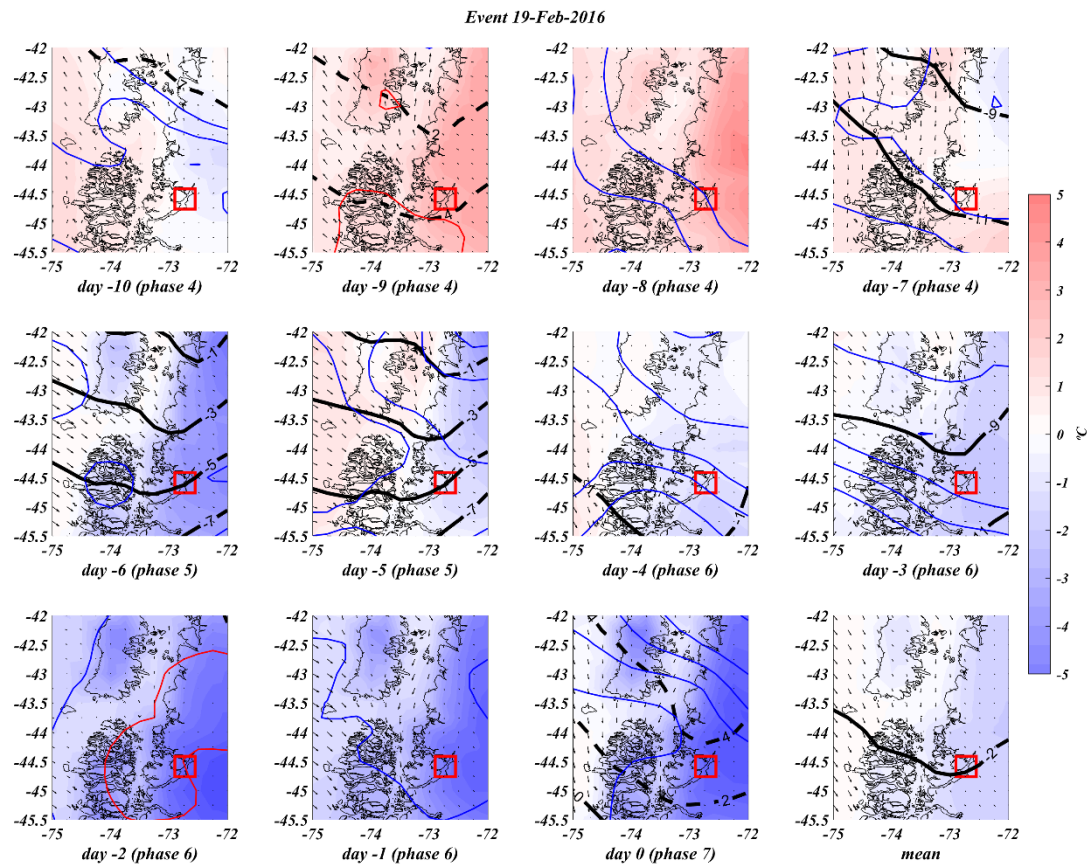

Figure S3. As Figure S1, but for the extreme event of high chl-a on 19-Feb-2016

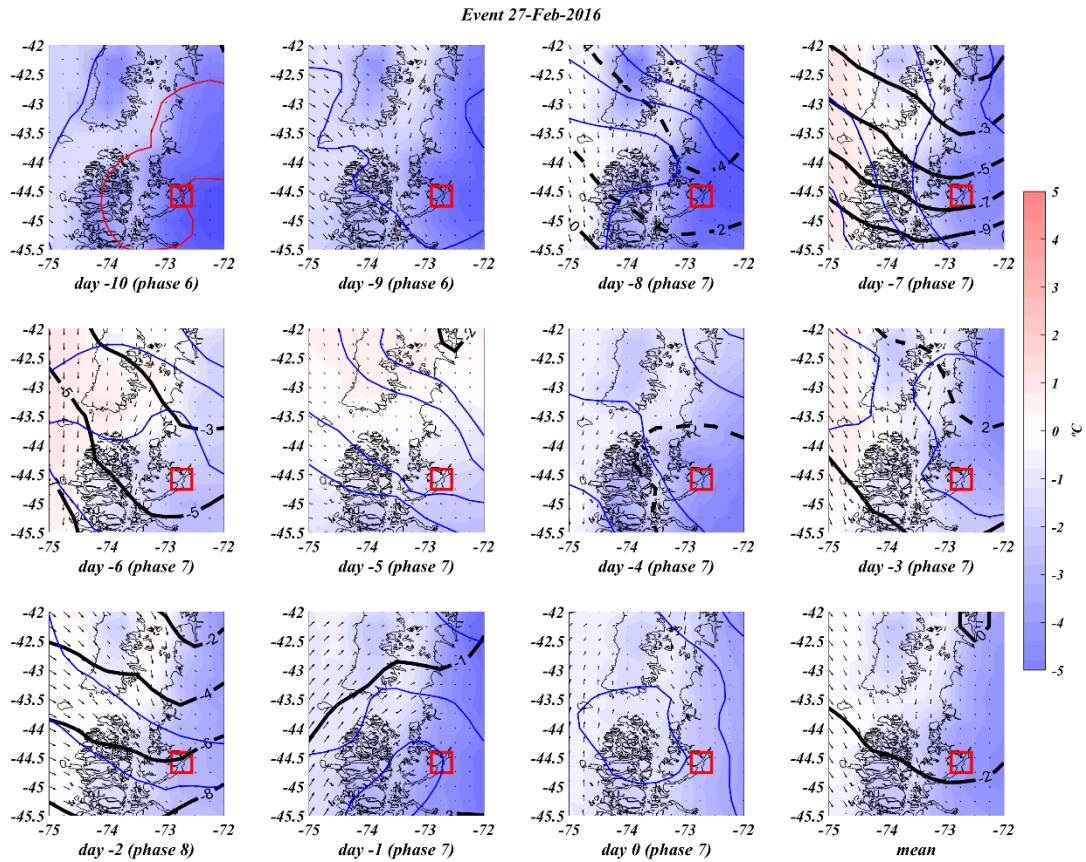

Figure S4. As Figure S1, but for the extreme event of high chl-a on 27-Feb-2016

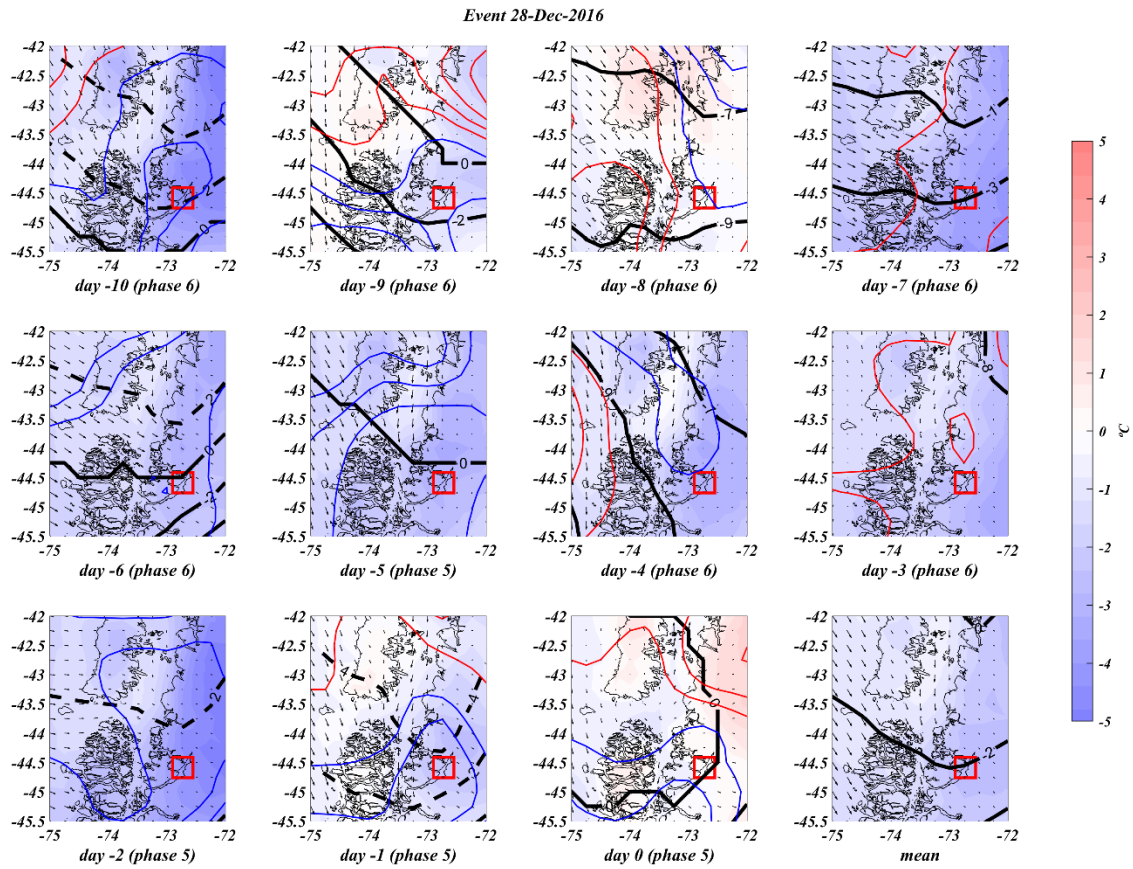

Figure S5. Like Figure S1, but for the extreme event of low chl-a on 28-Dec-2016

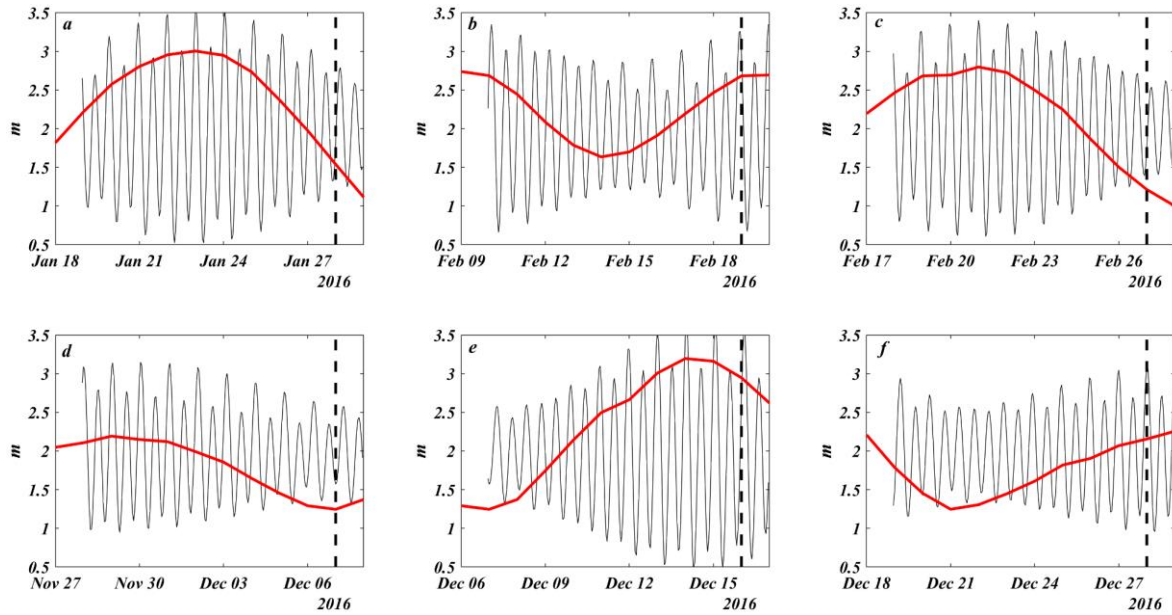

Figure S6. Daily values of sea level in Puyuhuapi South Channel starting 12 days before the occurrence of the extreme events of high chl-a on a) 28-Jan, b) 19-Feb, c) 27-Feb-2016 and extreme events of low chl-a on d) 7-Dec, e) 16-Dec and f) 28-Dec-2016. Black lines indicate daily values and red lines indicate amplitude of daily tide. Source: CDOM.
